# Supplementary material for: Solid oxide fuel cells with both high voltage and power output by utilizing beneficial interfacial reaction
Source: Royal Society of Chemistry journal article supplement (doi:10.1039/c2cp41166k), 2012-01-01
Supplement: c2cp41166k.pdf [file c2cp41166k.pdf]

# **Supporting Information**

**Solid oxide fuel cells with both high voltage and power output by  
utilizing beneficial interfacial reaction**

**Chao Su, Zongping Shao, Ye Lin, Yuzhou Wu and Huanting Wang**

## Supplementary Figures

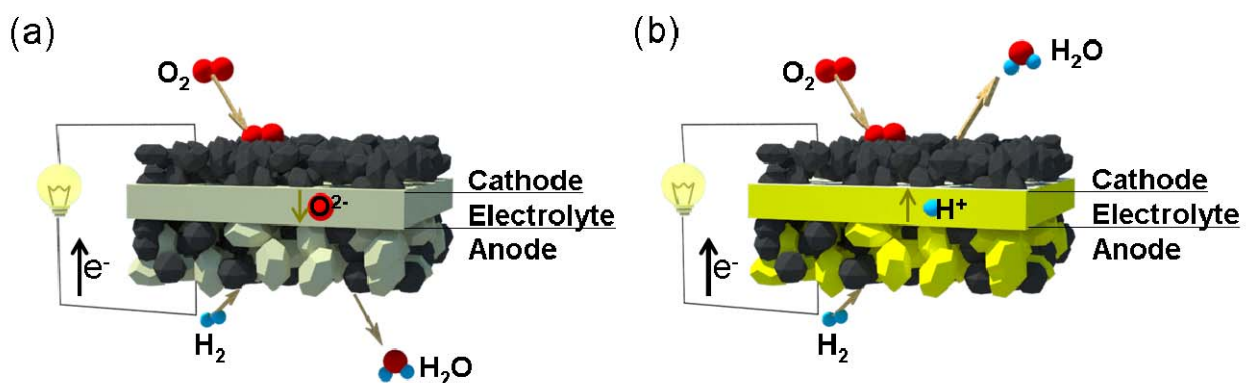

**Fig. S1** (a) Schematic of the oxygen-ionic conducting SOFC operating principle. (b) Schematic of the proton-conducting SOFC operating principle.

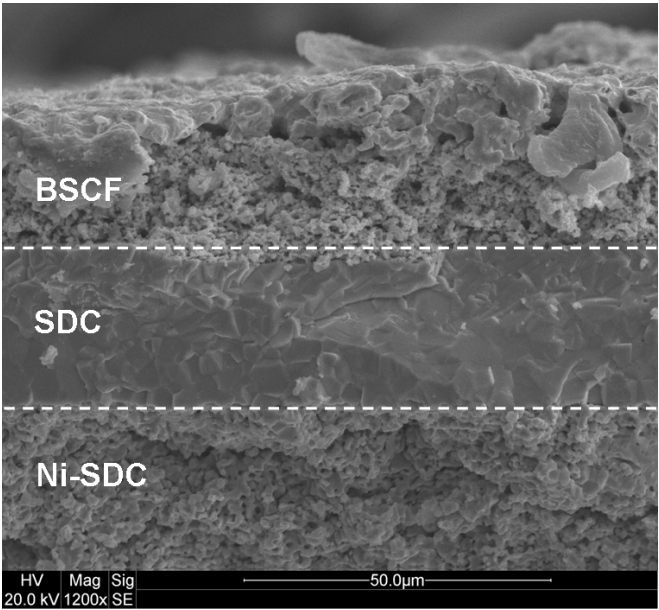

**Fig. S2** The SEM image of the cell with the configuration of Ni-SDC|SDC|BSCF from the cross-sectional view.

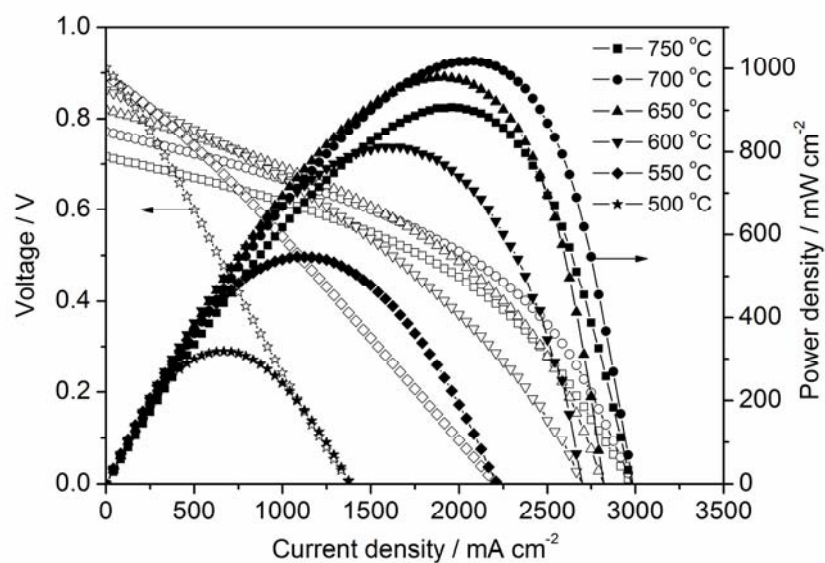

**Fig. S3** The  $I-V$  and  $I-P$  polarization curves of the Ni-SDC|SDC|BSCF cell at various temperatures with 3% water humidified hydrogen as fuel and ambient air as the cathode atmosphere.

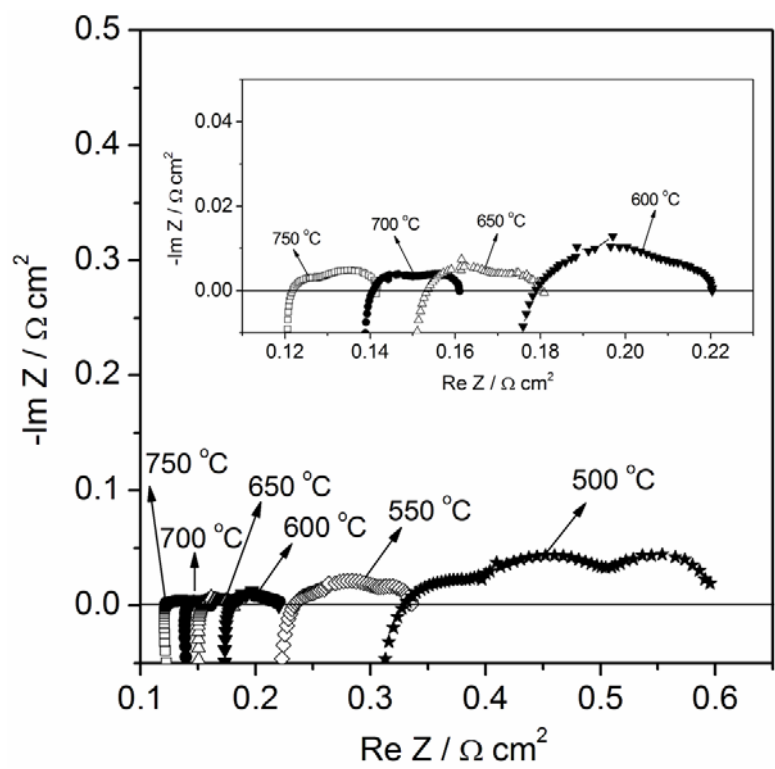

**Fig. S4** The electrochemical impedance spectroscopies of the Ni-SDC|SDC|BSCF cell tested under open circuit condition at various temperatures.

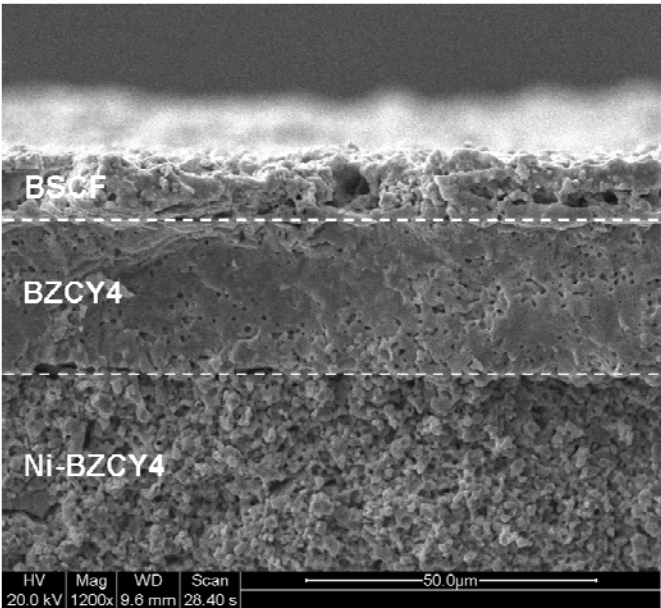

**Fig. S5** The SEM image of the cell with the configuration of Ni-BZCY4|BZCY4|BSCF from the cross-sectional view.

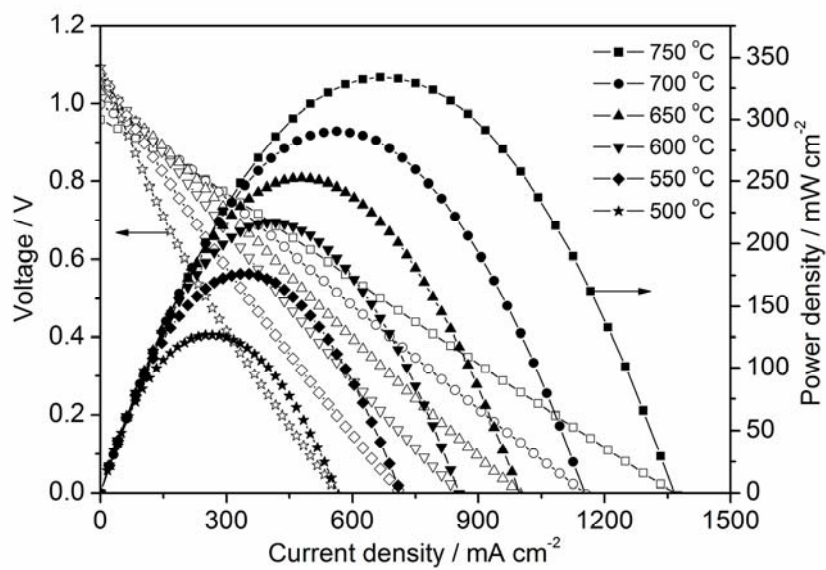

**Fig. S6** The *I-V* and *I-P* polarization curves of the Ni-BZCY4|BZCY4|BSCF cell at various temperatures with 3% water humidified hydrogen as fuel and ambient air as the cathode atmosphere.

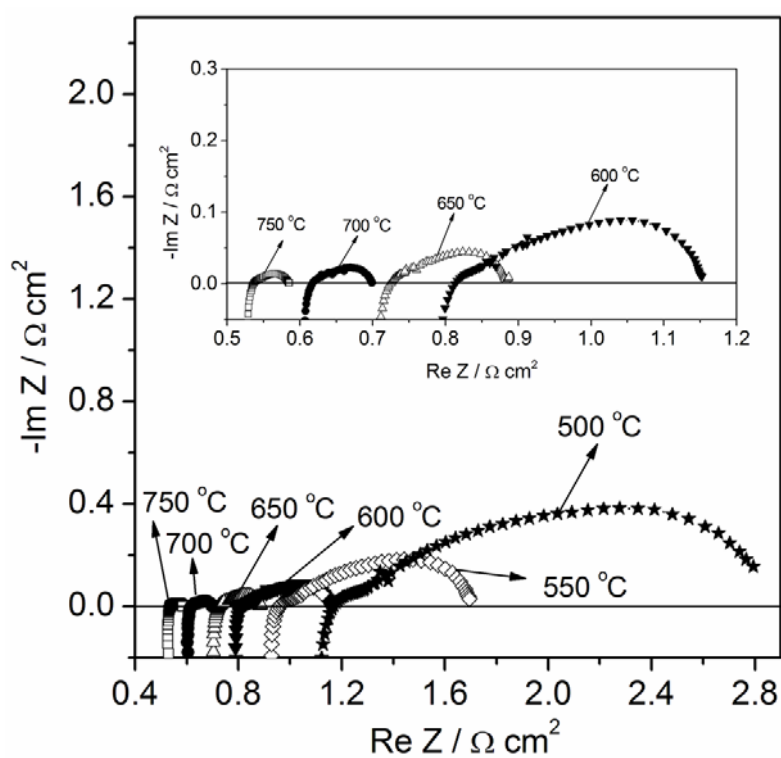

**Fig. S7** The electrochemical impedance spectroscopies of the Ni-BZCY4|BZCY4|BSCF cell tested under open circuit condition at various temperatures.
